# Supplementary material for: A systematic modeling study on the pathogenic role of p38 MAPK activation in myelodysplastic syndromes
Source: Royal Society of Chemistry journal article supplement (doi:10.1039/c2mb05184b), 2012-02-10
Supplement: c2mb05184b.pdf [file c2mb05184b.pdf]

## Text S1. ODEs system of the preliminary pathway model

To describe the biochemical reactions and connectivity of signaling molecules in this study, we adopted a deterministic ordinary differential equations (ODEs) model using the law of mass action, which are used to describe the time evolution of concentrations of various molecules and molecular complexes of interest. Here we describe the details for the ODEs system except for the TNF $\alpha$  receptor sub-system which has been described in Materials and Methods of main text. The equations along with the explanations are given as follows.

ASK1: Equation (1) describes the change on the concentration of ASK1 due to TRAF2C-mediated phosphorylation of ASK1 by (with rate  $k_1$ ) and pp38/pAKT-mediated dephosphorylation of pASK1 by (with rates  $k_2$  and  $k_3$  respectively).

$$\frac{d[ASK1]}{dt} = -k_1 * [ASK1][TRAF2C] + k_2 * [pASK1][pp38] + k_3 * [pASK1][pAKT]; \quad (1)$$

pASK1: Equation (2) describes the change on the concentration of pASK1 due to TRAF2C-mediated phosphorylation of ASK1 by (with rate  $k_1$ ) and pp38/pAKT-mediated dephosphorylation of pASK1 by (with rates  $k_2$  and  $k_3$  respectively).

$$\frac{d[pASK1]}{dt} = k_1 * [ASK1][TRAF2C] - k_2 * [pASK1][pp38] - k_3 * [pASK1][pAKT]; \quad (2)$$

MKK3/6: Equation (3) describes the change on the concentration of MKK3/6 due to pASK1-mediated phosphorylation of MKK3/6 (with rate  $k_4$ ) and auto-dephosphorylation of pMKK3/6 (with rate  $k_5$ ).

$$\frac{d[MKK3/6]}{dt} = -k_4 * [MKK3/6][pASK1] + k_5 * [pMKK3/6]; \quad (3)$$

pMKK3/6: Equation (4) describes the change on the concentration of pMKK3/6 due to pASK1-mediated phosphorylation of MKK3/6 (with rate  $k_4$ ) and auto-dephosphorylation of pMKK3/6 (with rate  $k_5$ ).

$$\frac{d[pMKK3/6]}{dt} = k_4 * [MKK3/6][pASK1] - k_5 * [pMKK3/6]; \quad (4)$$

p38: Equation (5) describes the change on the concentration of p38 due to pMKK3/6-mediated phosphorylation of p38 (with rate  $k_6$ ) and pJNK-mediated dephosphorylation of pp38 (with rate  $k_7$ ).

$$\frac{d[p38]}{dt} = -k_6 * [p38][pMKK3/6] + k_7 * [pp38][pJNK]; \quad (5)$$

pp38: Equation (6) describes the change on the concentration of pp38 due to pMKK3/6-mediated

phosphorylation of p38 (with rate  $k_6$ ) and pJNK-mediated dephosphorylation of pp38 (with rate  $k_7$ ).

$$\frac{d[pp38]}{dt} = k_6 * [p38][pMKK3/6] - k_7 * [pp38][pJNK]; \quad (6)$$

MEKK1: Equation (7) describes the change on the concentration of MEKK1 due to TRAF2C-mediated phosphorylation of MEKK1 (with rate  $k_8$ ) and auto-dephosphorylation of pMEKK1 (with rate  $k_9$ ).

$$\frac{d[MEKK1]}{dt} = -k_8 * [MEKK1][TRAF2C] + k_9 * [pMEKK1]; \quad (7)$$

pMEKK1: Equation (8) describes the change on the concentration of pMEKK1 due to TRAF2C-mediated phosphorylation of MEKK1 (with rate  $k_8$ ) and auto-dephosphorylation of pMEKK1 (with rate  $k_9$ ).

$$\frac{d[pMEKK1]}{dt} = k_8 * [MEKK1][TRAF2C] - k_9 * [pMEKK1]; \quad (8)$$

MKK4/7: Equation (9) describes the change on the concentration of MKK4/7 due to pASK1/pMEKK1-mediated phosphorylation of MKK4/7 (with rates  $k_{10}$  and  $k_{11}$  respectively) and pAKT-mediated dephosphorylation of pMKK4/7 (with rate  $k_{12}$ ).

$$\frac{d[MKK4/7]}{dt} = -k_{10} * [MKK4/7][pASK1] - k_{11} * [MKK4/7][pMEKK1] + k_{12} * [pMKK4/7][pAKT]; \quad (9)$$

pMKK4/7: Equation (10) describes the change on the concentration of pMKK4/7 due to pASK1/pMEKK1-mediated phosphorylation of MKK4/7 (with rates  $k_{10}$  and  $k_{11}$  respectively) and pAKT-mediated dephosphorylation of pMKK4/7 (with rate  $k_{12}$ ).

$$\frac{d[pMKK4/7]}{dt} = k_{10} * [MKK4/7][pASK1] + k_{11} * [MKK4/7][pMEKK1] - k_{12} * [pMKK4/7][pAKT]; \quad (10)$$

JNK: Equation (11) describes the change on the concentration of JNK due to pMKK4/7-mediated phosphorylation of JNK (with rate  $k_{13}$ ) and pp38-mediated dephosphorylation of pJNK (with rate  $k_{14}$ ).

$$\frac{d[JNK]}{dt} = -k_{13} * [JNK][pMKK4/7] + k_{14} * [pJNK][pp38]; \quad (11)$$

pJNK: Equation (12) describes the change on the concentration of pJNK due to pMKK4/7-mediated phosphorylation of JNK (with rate  $k_{13}$ ) and pp38-mediated dephosphorylation of pJNK (with rate  $k_{14}$ ).

$$\frac{d[pJNK]}{dt} = k_{13} * [JNK][pMKK4/7] - k_{14} * [pJNK][pp38]; \quad (12)$$

c\_Jun: Equation (13) describes the change on the concentration of c\_Jun due to pp38/pJNK-mediated phosphorylation of c\_Jun (with rates  $k_{15}$  and  $k_{16}$  respectively) and auto-dephosphorylation of pc\_Jun

(with rate  $k_{17}$ ).

$$\frac{d[c\_Jun]}{dt} = -k_{15} * [c\_Jun][pp38] - k_{16} * [c\_Jun][pJNK] + k_{17} * [pc\_Jun]; \quad (13)$$

pc\_Jun: Equation (14) describes the change on the concentration of pc\_Jun due to pp38/pJNK-mediated phosphorylation of c\_Jun (with rates  $k_{15}$  and  $k_{16}$  respectively) and auto-dephosphorylation of pc\_Jun (with rate  $k_{17}$ ).

$$\frac{d[pc\_Jun]}{dt} = k_{15} * [c\_Jun][pp38] + k_{16} * [c\_Jun][pJNK] - k_{17} * [pc\_Jun]; \quad (14)$$

AKT: Equation (15) describes the change on the concentration of AKT due to auto-phosphorylation of AKT (with rate  $k_{18}$ ) and pp53-mediated dephosphorylation of pAKT (with rate  $k_{19}$ ).

$$\frac{d[AKT]}{dt} = -k_{18} * [AKT] + k_{19} * [pAKT][pp53]; \quad (15)$$

pAKT: Equation (16) describes the change on the concentration of pAKT due to auto-phosphorylation of AKT (with rate  $k_{18}$ ) and pp53-mediated dephosphorylation of pAKT (with rate  $k_{19}$ ).

$$\frac{d[pAKT]}{dt} = k_{18} * [AKT] - k_{19} * [pAKT][pp53]; \quad (16)$$

p53: Equation (17) describes the change on the concentration of p53 due to pp38/pJNK-mediated phosphorylation of p53 (with rates  $k_{20}$  and  $k_{21}$  respectively) and pAKT-mediated dephosphorylation of pp53 (with rate  $k_{22}$ ).

$$\frac{d[p53]}{dt} = -k_{20} * [p53][pp38] - k_{21} * [p53][pJNK] + k_{22} * [pp53][pAKT]; \quad (17)$$

pp53: Equation (18) describes the change on the concentration of pp53 due to pp38/pJNK-mediated phosphorylation of p53 (with rates  $k_{20}$  and  $k_{21}$  respectively) and pAKT-mediated dephosphorylation of pp53 (with rate  $k_{22}$ ).

$$\frac{d[pp53]}{dt} = k_{20} * [p53][pp38] + k_{21} * [p53][pJNK] - k_{22} * [pp53][pAKT]; \quad (18)$$

BCL\_XL: Equation (19) describes the change on the concentration of BCL\_XL due to pp38/pJNK-mediated phosphorylation of BCL\_XL (with rates  $k_{23}$  and  $k_{24}$  respectively) and auto-dephosphorylation of pBCL\_XL (with rate  $k_{25}$ ).

$$\frac{d[BCL\_XL]}{dt} = -k_{23} * [pp38][BCL\_XL] - k_{24} * [pJNK][BCL\_XL] + k_{25} * [pBCL\_XL]; \quad (19)$$

pBCL\_XL: Equation (20) describes the change on the concentration of pBCL\_XL due to pp38/pJNK-

mediated phosphorylation of BCL\_XL (with rates  $k_{23}$  and  $k_{24}$  respectively), auto-dephosphorylation of pBCL\_XL (with rate  $k_{25}$ ) and auto-degradation of pBCL\_XL (with rate  $k_{26}$ ).

$$\frac{d[pBCL\_XL]}{dt} = k_{23} * [pp38][BCL\_XL] + k_{24} * [pJNK][BCL\_XL] - k_{25} * [pBCL\_XL] - k_{26} * [pBCL\_XL]; \quad (20)$$

dBCL\_XL: Equation (21) describes the change on the concentration of dBCL\_XL (degraded BCL\_XL) due to the auto-dephosphorylation of pBCL\_XL (with rate  $k_{26}$ ).

$$\frac{d[dBCL\_XL]}{dt} = k_{26} * [pBCL\_XL]; \quad (21)$$
