# Supplementary figures and images for: A systematic modeling study on the pathogenic role of p38 MAPK activation in myelodysplastic syndromes
Source: Royal Society of Chemistry journal article supplement (doi:10.1039/c2mb05184b), 2012-02-10

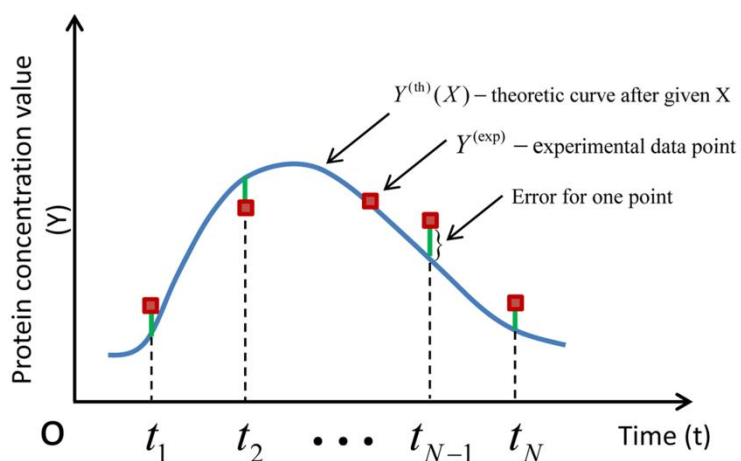

Figure S1

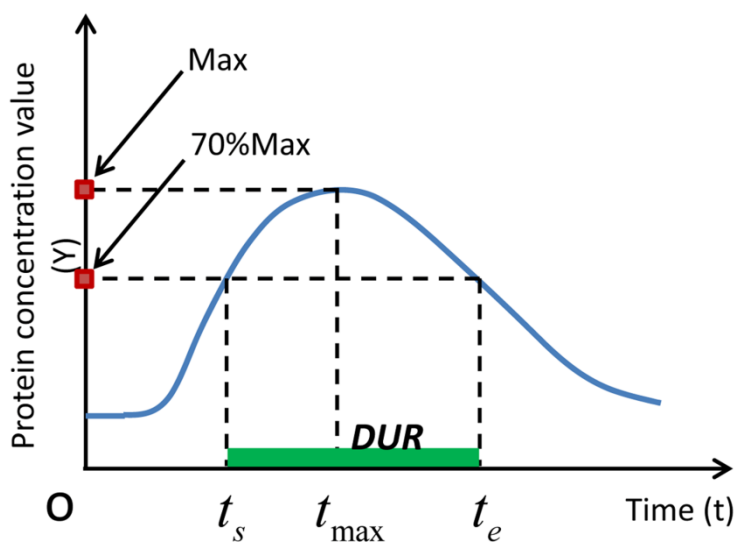

Figure S2

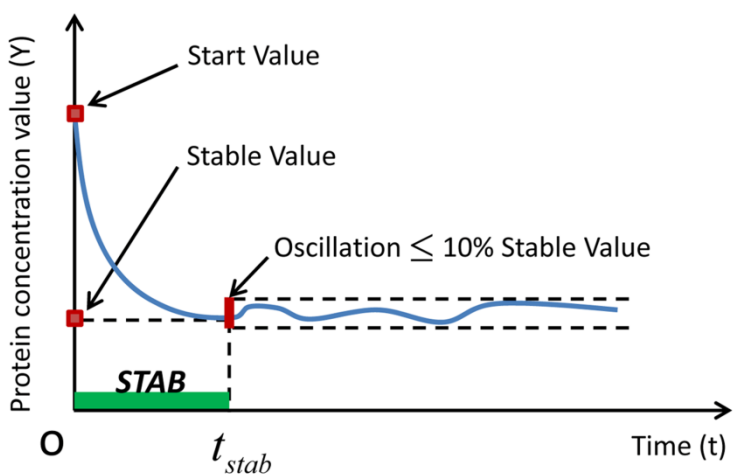

Figure S3

Supplement: c2mb05184b_3.pdf [file c2mb05184b_3.pdf]
